# Supplementary material for: Evaluation of anaesthetic protocols for laboratory adult zebrafish (Danio rerio)
Source: PLOS journal article supplement (doi:10.1371/journal.pone.0197846), 2018-05-22
Supplement: S3 (10.1371/journal.pone.0197846.s003) [file journal.pone.0197846.s003]

**S3 Table. Respiratory rate (RR) after loss of equilibrium and loss of the soft stimulus reflex, for the different protocols tested, in RR per minute (RR/min), median [interquartile range].**

| <b>Anaesthetic protocols</b>                                                             | <b>RR after loss of equilibrium</b> | <b>RR after the loss of the soft stimulus reflex</b> |
|------------------------------------------------------------------------------------------|-------------------------------------|------------------------------------------------------|
| <b>100 µg/mL MS</b>                                                                      | 116 RR/min [104.7 to 127.3 RR/min]  | 80 RR/min [75.08 to 88.92 RR/min]                    |
| <b>2 µg/mL E</b>                                                                         | 62 RR/min [58.85 to 73.15 RR/min]   | 54 RR/min [46.83 to 60.17 RR/min]                    |
| <b>2 µg/mL E + 100 µg/mL L</b>                                                           | 78 RR/min [63.35 to 85.65 RR/min]   | 52 RR/min [43.82 to 59.18 RR/min]                    |
| <b>1.25 µg/mL P</b>                                                                      | 84 RR/min [75.93 to 97.07 RR/min]   | 68 RR/min [64.07 to 75.93 RR/min]                    |
| <b>1.25 µg/mL P + 100 µg/mL L</b>                                                        | 100 RR/min [96.08 to 109.9 RR/min]  | 82 RR/min [71.43 to 92.57 RR/min]                    |
| <b>100 µg/mL K</b>                                                                       | 104 RR/min [85.23 to 110.8 RR/min]  | 78 RR/min [65.37 to 91.63 RR/min]                    |
| <b>100 µg/mL K + 1.25 µg/mL M</b>                                                        | 102 RR/min [92.42 to 108.6 RR/min]  | 88 RR/min [78.71 to 97.29 RR/min]                    |
| MS – MS-222; E – Etomidate; L – Lidocaine; P – Propofol; K – Ketamine; M – Medetomidine. |                                     |                                                      |
