# Supplementary material for: Evaluation of anaesthetic protocols for laboratory adult zebrafish (Danio rerio)
Source: PLOS journal article supplement (doi:10.1371/journal.pone.0197846), 2018-05-22
Supplement: S4 (10.1371/journal.pone.0197846.s004) [file journal.pone.0197846.s004]

**S4 Table. Activity 5 hours and 24 hours post-anaesthesia, for the different protocols tested, in number of crosses per minute (cross/min), median [interquartile range].**

| <b>Anaesthetic protocols</b>                                                                              | <b>Activity 5 hours post-anaesthesia</b>  | <b>Activity 24 hours post-anaesthesia</b> |
|-----------------------------------------------------------------------------------------------------------|-------------------------------------------|-------------------------------------------|
| <b>Control</b>                                                                                            | 13 cross/min [10.09 to 15.91 cross/min]   | 12.5 cross/min [11.23 to 14.27 cross/min] |
| <b>100 µg/mL MS</b>                                                                                       | 11.5 cross/min [10.54 to 12.71 cross/min] | 15 cross/min [12.85 to 15.65 cross/min]   |
| <b>2 µg/mL E</b>                                                                                          | 12 cross/min [10.86 to 12.39 cross/min]   | 13.5 cross/min [12.74 to 14.51 cross/min] |
| <b>2 µg/mL E + 100 µg/mL L</b>                                                                            | 11 cross/min [10.54 to 12.71 cross/min]   | 13 cross/min [12.28 to 14.22 cross/min]   |
| <b>1.25 µg/mL P</b>                                                                                       | 11.5 cross/min [10.93 to 13.57 cross/min] | 14.5 cross/min [13.24 to 15.76 cross/min] |
| <b>1.25 µg/mL P + 100 µg/mL L</b>                                                                         | 12.5 cross/min [11.68 to 13.82 cross/min] | 15 cross/min [13.66 to 16.09 cross/min]   |
| <b>100 µg/mL K</b>                                                                                        | 12.5 cross/min [11.63 to 13.62 cross/min] | 15 cross/min [14.18 to 16.07 cross/min]   |
| <b>100 µg/mL K + 1.25 µg/mL M</b>                                                                         | 11.5 cross/min [10.74 to 12.51 cross/min] | 13 cross/min [12.38 to 14.37 cross/min]   |
| <b>100 µg/mL K + 1.25 µg/mL M /<br/>3.125 µg/mL A</b>                                                     | 12.5 cross/min [10.99 to 13.26 cross/min] | 14.5 cross/min [13.73 to 15.27 cross/min] |
| MS – MS-222; E – Etomidate; L – Lidocaine; P – Propofol; K – Ketamine; M – Medetomidine; A – Atipamezole. |                                           |                                           |
